# Supplementary material for: A facile analytical method for reliable selectivity examination in cofactor NADH regeneration
Source: Royal Society of Chemistry journal article supplement (doi:10.1039/c9cc07805c), 2019-12-18
Supplement: c9cc07805c1.pdf [file c9cc07805c1.pdf]

## Electronic Supplementary Information (ESI)

### **A facile analytical method for reliable selectivity examination in cofactor NADH regeneration**

Tony Saba, Joseph W.H. Burnett, Jianwei Li, Panagiotis N. Kechagiopoulos and Xiaodong Wang\*‡

Chemical and Materials Engineering, School of Engineering, University of Aberdeen, Aberdeen AB24  
3UE, United Kingdom

\*Corresponding Author: [xiaodong.wang@lancaster.ac.uk](mailto:xiaodong.wang@lancaster.ac.uk)

‡Present address: Department of Engineering, Lancaster University, Lancaster LA1 4YW, United  
Kingdom

## Table of Content

|                                                                                                    |       |
|----------------------------------------------------------------------------------------------------|-------|
| I. Materials.....                                                                                  | ESI3  |
| II. Apparatus .....                                                                                | ESI3  |
| III. Enzymatic kit procedure for the quantification of total NAD(H).....                           | ESI4  |
| IV. Enzymatic kit procedure for the quantification of 1,4-NADH .....                               | ESI5  |
| V. Preparation of 1,2-NADH, 1,4-NADH and 1,6-NADH by sodium borohydride $\text{NAD}^+$ reduction . | ESI5  |
| VI. Reoxidation of 1,4-NADH to $\text{NAD}^+$ over alcohol dehydrogenase (ADH).....                | ESI6  |
| VII. NADH regeneration by the hydrogenation of $\text{NAD}^+$ with hydrogen and Pt/C catalyst..... | ESI6  |
| VIII. Supporting table and figures .....                                                           | ESI7  |
| References .....                                                                                   | ESI11 |

## I. Materials

$\beta$ -Nicotinamide adenine dinucleotide hydrate ( $\text{NAD}^+$ ,  $\geq 96.5\%$ ),  $\beta$ -nicotinamide adenine dinucleotide reduced disodium salt hydrate ( $\text{NADH}$ ,  $\geq 94\%$ ), potassium phosphate monobasic ( $\text{KH}_2\text{PO}_4$ ,  $\geq 99\%$ ), potassium phosphate dibasic trihydrate ( $\text{K}_2\text{HPO}_4 \cdot 3\text{H}_2\text{O}$ ,  $\geq 99\%$ ), VenPure SF sodium borohydride ( $\text{NaBH}_4$ ,  $\geq 98.5\%$ ), Triethanolamine (TEOA,  $\geq 99.0\%$ ), acetaldehyde ( $\text{CH}_3\text{CHO}$ ,  $\geq 99.5\%$ ), alcohol dehydrogenase from *Saccharomyces cerevisiae* ( $\geq 300$  units  $\text{mg}^{-1}$ ), and platinum on activated carbon (1 wt. % loading) were obtained from Sigma-Aldrich. EnzyChrom™ NAD/NADH assay kit was purchased from Universal Biologicals. Invitrogen ultrapure tris buffer ( $\geq 99.99\%$ ) and hydrochloric acid solution (1 M) were purchased from Fischer Scientific. All the chemicals were used as received without further purification. The  $\text{H}_2$  and  $\text{N}_2$  gases of ultrahigh purity ( $\geq 99.99\%$ ) were supplied by BOC.

## II. Apparatus

All the absorbance measurements were done using JENWAY 6850 double beam UV-Visible Spectrophotometer with wavelength range between 190 and 1100 nm. The Pt content of the catalyst was measured by inductively coupled plasma optical emission spectrometry (ICP-OES, Varian Vista-MPX) from the diluted extract in HF. Nitrogen adsorption-desorption isotherms were obtained using a commercial automated Micromeritics Tristar II 3000 Analyser. Specific surface area was obtained from the adsorption isotherms using the standard BET method. Pore volume and pore size were determined by BJH analysis of desorption profiles. Transmission electron microscopy (TEM) images were taken on FEI Tecnai G2 F20 equipment. Particle size distribution was determined from TEM images by counting approximately 150 particles. X-ray diffraction (XRD) experiments were

performed on a Panalytical powder X-ray diffractometer. The diffraction patterns were recorded over an angular range of  $10^\circ < 2\theta < 90^\circ$  with a step-size of  $0.02^\circ$ .

### III. Enzymatic kit procedure for the quantification of total NAD(H)

The supplied EnzyChrom™ kit consists of Assay Buffer, 1.5 mL of Lactate, 1.5 mL of MTT solution, 120  $\mu\text{L}$  of Enzyme A (Lactate Dehydrogenase), 120  $\mu\text{L}$  of Enzyme B (Diaphorase) and 500  $\mu\text{L}$  of NAD (1 mM) stock solution (i.e.  $\text{NAD}_0$ ). It is noteworthy that when not in use the enzymatic kit has to be stored at  $-20^\circ\text{C}$ . Prior to use, remove all components (except enzymes) and allow them to defrost at room temperature for at least 20 minutes. Prior to analysis, prepare diluted NAD solutions (i.e. two dilutions are required for a better accuracy) as follows:

| NAD(H) concentration ( $\mu\text{M}$ ) | First Dilution ( $\text{NAD}_1$ solution)               |                          | Second Dilution ( $\text{NAD}_2$ solution) |                          |
|----------------------------------------|---------------------------------------------------------|--------------------------|--------------------------------------------|--------------------------|
|                                        | NAD stock solution ( $\text{NAD}_0$ ) ( $\mu\text{L}$ ) | Buffer ( $\mu\text{L}$ ) | $\text{NAD}_1$ ( $\mu\text{L}$ )           | Buffer ( $\mu\text{L}$ ) |
| 2.5                                    | 25                                                      | 975                      | 100                                        | 900                      |
| 5.0                                    | 50                                                      | 950                      | 100                                        | 900                      |
| 7.5                                    | 75                                                      | 925                      | 100                                        | 900                      |
| 10.0                                   | 100                                                     | 900                      | 100                                        | 900                      |

For each of the diluted standards, prepare working reagent (i.e. one at a time) by mixing 60  $\mu\text{L}$  of assay buffer, 1  $\mu\text{L}$  of Enzyme A, 1  $\mu\text{L}$  of Enzyme B, 14  $\mu\text{L}$  of Lactate and 14  $\mu\text{L}$  of MTT solution. For each analysis, take 80  $\mu\text{L}$  of the working reagent and mix it quickly with 240  $\mu\text{L}$  of the prepared  $\text{NAD}_2$  solution, then transfer the whole reaction mixture into a quartz cuvette (2 mm path length) and start recording the 565 nm change against buffer solution used as reference (i.e. time 0 is the time the reagents are mixed together).

#### IV. Enzymatic kit procedure for the quantification of 1,4-NADH

Prepare a stock solution of 0.5 mM 1,4-NADH (i.e. NADH<sub>0</sub>) in phosphate buffer pH 7.

Prepare the 1,4-NADH standards as follows:

| 1,4-NADH concentration (mM) | NADH <sub>1</sub> solution              |             |
|-----------------------------|-----------------------------------------|-------------|
|                             | NADH solution (NADH <sub>0</sub> ) (μL) | Buffer (μL) |
| 0.01                        | 20                                      | 980         |
| 0.05                        | 100                                     | 900         |
| 0.1                         | 200                                     | 800         |
| 0.2                         | 400                                     | 600         |
| 0.3                         | 600                                     | 400         |
| 0.4                         | 800                                     | 200         |
| 0.5                         | 1000                                    | 0           |

For each of the diluted standards, prepare working reagent (i.e. one at a time) by mixing 60 μL of assay buffer, 1 μL of Enzyme B and 14 μL of MTT solution. For each analysis, take 75 μL of the working reagent and mix it quickly with 240 μL of the prepared NADH<sub>1</sub> solution, then transfer the whole reaction mixture into a quartz cuvette (2 mm path length) and start recording the 565 nm change against buffer solution used as reference (i.e. time 0 is the time the reagents are mixed together).

#### V. Preparation of 1,2-NADH, 1,4-NADH and 1,6-NADH by sodium borohydride NAD<sup>+</sup> reduction

In a typical reduction reaction, 66.20 mg of NaBH<sub>4</sub> was added to 100 mL of 0.1 M potassium phosphate buffer, pH 7, containing 16.59 mg of NAD<sup>+</sup> (equivalent to 0.25 mM). The reaction was carried in a 100 mL Erlenmeyer flask in a fume hood under a mild stirring of 300 rpm to help the removal of hydrogen formed as a result of sodium borohydride decomposition in water. About 5 minutes were allowed for the reaction to complete. Samples

were taken and analysed in the UV to make sure there is no more increase in the absorbance at 340 nm. The same procedure was repeated but with higher initial concentration of NAD<sup>+</sup> (0.50 and 0.75 mM) while keeping the molar ratio of NaBH<sub>4</sub> to NAD<sup>+</sup> fixed at 70.

## **VI. Reoxidation of 1,4-NADH to NAD<sup>+</sup> over alcohol dehydrogenase (ADH)**

The oxidation reaction was carried in a 3.5 mL cuvette containing 2 mL of reaction mixture (1,4- and 1,6-NADH), 1 mL of ADH (2 mg mL<sup>-1</sup>) and 0.5 mL of acetaldehyde (0.5 M). It is very important that the acetaldehyde is added last and that high amounts of enzymes are in place to rapidly oxidise 1,4-NADH in such a way to avoid any loss of 1,4-NADH through addition to the 5,6-double bond.<sup>1</sup> The oxidation reaction was followed in the spectrophotometer at 340 nm until there was no more decrease in the absorbance.

## **VII. NADH regeneration by the hydrogenation of NAD<sup>+</sup> with hydrogen and Pt/C catalyst**

The hydrogenation reaction was conducted in a Parr<sup>®</sup> 5500 compact reactor (with a Parr<sup>®</sup> 4848 reactor controller) following the procedure in our previous works.<sup>2</sup> The hydrogenation reaction was conducted in a pressurized system at room temperature (22 °C) in a tris-buffer pH 8.5. In the experiment, 5 mg of the catalyst and 50 mL 0.1 M tris buffered solution (pH 8.5) containing NAD<sup>+</sup> (1 mM) were loaded into the reactor. The system was flushed (three times) with N<sub>2</sub> (3 atm). Hydrogen gas was then introduced, the system was pressurised to 8 atm and stirring (900 rpm) was engaged (time t = 0 for reaction). A non-invasive liquid sampling system via syringe/in-line filters allowed the controlled removal of aliquots from the reactor. Samples were taken periodically and the total absorbance at 340 nm was measured using JENWAY 6850 double beam UV-Visible Spectrophotometer.

## VIII. Supporting Table and Figures

**Table S1:** A literature summary of analytical methods used for the quantification of NADH

| Regeneration Method   | Analytical Method                   |                                     |                                     |                                     |                                     | References |
|-----------------------|-------------------------------------|-------------------------------------|-------------------------------------|-------------------------------------|-------------------------------------|------------|
|                       | UV-Vis Spectroscopy                 | Enzymatic Assay                     | HPLC                                | NMR                                 | Fluorescence Spectroscopy           |            |
| Biocatalytic          | <input checked="" type="checkbox"/> | <input checked="" type="checkbox"/> | <input type="checkbox"/>            | <input type="checkbox"/>            | <input type="checkbox"/>            | 3          |
| Biocatalytic          | <input checked="" type="checkbox"/> | <input type="checkbox"/>            | <input type="checkbox"/>            | <input type="checkbox"/>            | <input type="checkbox"/>            | 4          |
| Electrochemical       | <input checked="" type="checkbox"/> | <input type="checkbox"/>            | <input type="checkbox"/>            | <input type="checkbox"/>            | <input type="checkbox"/>            | 5          |
| Electrochemical       | <input checked="" type="checkbox"/> | <input checked="" type="checkbox"/> | <input type="checkbox"/>            | <input type="checkbox"/>            | <input type="checkbox"/>            | 6          |
| Electrochemical       | <input checked="" type="checkbox"/> | <input checked="" type="checkbox"/> | <input type="checkbox"/>            | <input type="checkbox"/>            | <input type="checkbox"/>            | 7          |
| Electrochemical       | <input checked="" type="checkbox"/> | <input checked="" type="checkbox"/> | <input type="checkbox"/>            | <input type="checkbox"/>            | <input type="checkbox"/>            | 8          |
| Homogeneous Catalytic | <input checked="" type="checkbox"/> | <input checked="" type="checkbox"/> | <input checked="" type="checkbox"/> | <input type="checkbox"/>            | <input type="checkbox"/>            | 9          |
| Homogeneous Catalytic | <input checked="" type="checkbox"/> | <input type="checkbox"/>            | <input type="checkbox"/>            | <input checked="" type="checkbox"/> | <input type="checkbox"/>            | 10         |
| Homogeneous Catalytic | <input type="checkbox"/>            | <input type="checkbox"/>            | <input type="checkbox"/>            | <input checked="" type="checkbox"/> | <input type="checkbox"/>            | 11         |
| Homogeneous Catalytic | <input checked="" type="checkbox"/> | <input type="checkbox"/>            | <input type="checkbox"/>            | <input type="checkbox"/>            | <input type="checkbox"/>            | 12         |
| Homogeneous Catalytic | <input checked="" type="checkbox"/> | <input type="checkbox"/>            | <input type="checkbox"/>            | <input type="checkbox"/>            | <input type="checkbox"/>            | 13         |
| Photocatalytic        | <input checked="" type="checkbox"/> | <input checked="" type="checkbox"/> | <input type="checkbox"/>            | <input checked="" type="checkbox"/> | <input type="checkbox"/>            | 14         |
| Photocatalytic        | <input type="checkbox"/>            | <input type="checkbox"/>            | <input type="checkbox"/>            | <input type="checkbox"/>            | <input checked="" type="checkbox"/> | 15         |
| Photocatalytic        | <input type="checkbox"/>            | <input type="checkbox"/>            | <input type="checkbox"/>            | <input type="checkbox"/>            | <input checked="" type="checkbox"/> | 16         |
| Photocatalytic        | <input checked="" type="checkbox"/> | <input type="checkbox"/>            | <input type="checkbox"/>            | <input type="checkbox"/>            | <input type="checkbox"/>            | 17         |
| Photocatalytic        | <input checked="" type="checkbox"/> | <input type="checkbox"/>            | <input type="checkbox"/>            | <input type="checkbox"/>            | <input type="checkbox"/>            | 18         |
| Photocatalytic        | <input checked="" type="checkbox"/> | <input type="checkbox"/>            | <input type="checkbox"/>            | <input type="checkbox"/>            | <input type="checkbox"/>            | 19         |
| Photocatalytic        | <input checked="" type="checkbox"/> | <input type="checkbox"/>            | <input type="checkbox"/>            | <input type="checkbox"/>            | <input type="checkbox"/>            | 20         |
| Photocatalytic        | <input checked="" type="checkbox"/> | <input type="checkbox"/>            | <input type="checkbox"/>            | <input type="checkbox"/>            | <input type="checkbox"/>            | 21         |
| Photocatalytic        | <input checked="" type="checkbox"/> | <input type="checkbox"/>            | <input type="checkbox"/>            | <input type="checkbox"/>            | <input type="checkbox"/>            | 22         |
| Photocatalytic        | <input checked="" type="checkbox"/> | <input type="checkbox"/>            | <input type="checkbox"/>            | <input type="checkbox"/>            | <input type="checkbox"/>            | 23         |

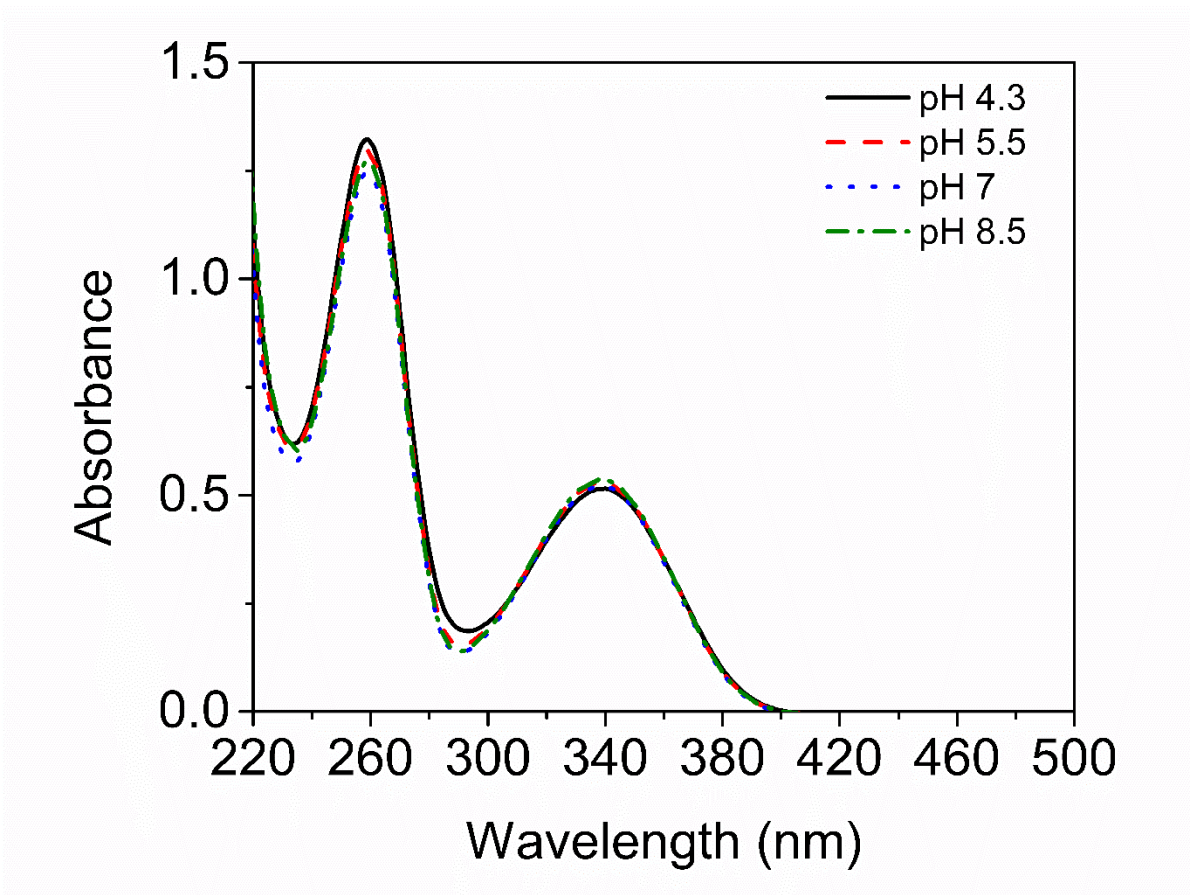

**Fig. S1** Effect of initial pH on fresh 1,4-NADH solutions at 0.1 mM.

Fig. S1 confirms that the initial pH of a solution does not affect the UV spectra, and the epsilon obtained should be applicable at different values of pH.



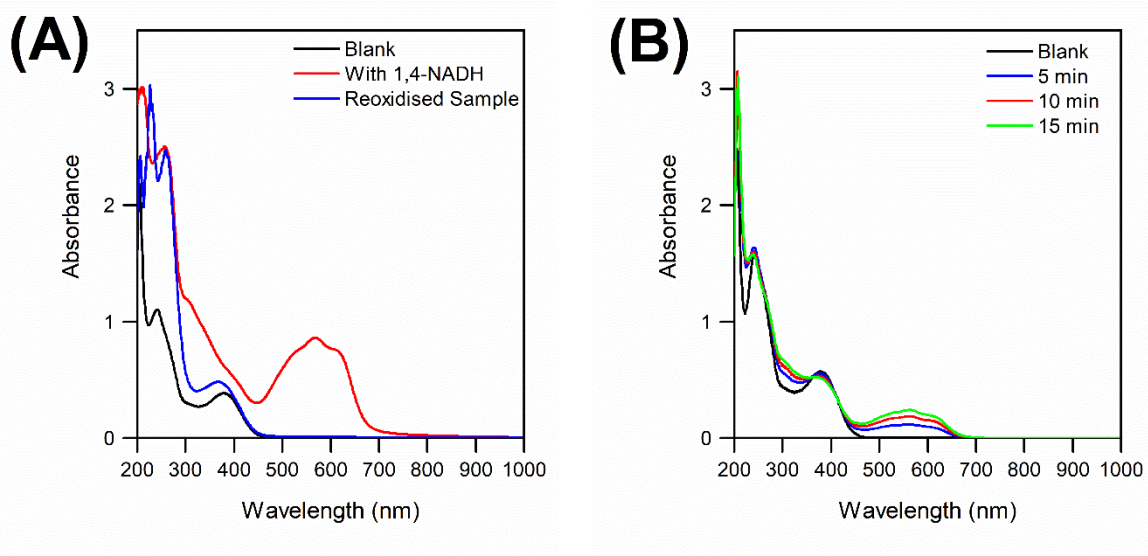

**Fig. S2** (A) Half kit full UV-Vis scans (Blank: no 1,4-NADH in place; With 1,4-NADH: 1,4-NADH in place at  $C = 0.5$  mM after 5 min assay time; Reoxidised Sample: From ADH catalysed reoxidation reaction containing  $\text{NAD}^+$ , 1,2-NADH and 1,6-NADH at a total concentration of 0.5 mM and after 5 min assay time. (B) Full kit UV-Vis scans for 10  $\mu\text{M}$  NAD(H) throughout the kit measurement time (Blank: No NAD(H) in place)

The reoxidised 1,4-NADH sample demonstrated that 1,2-NADH and 1,6-NADH are enzymatically inactive isomers with their inability to transfer a hydride (i.e. the reducing equivalent) to an oxidised substrate (i.e. MTT in our case). As shown in the Fig. S2(A), the half kit (in blue) exhibits no absorbance at 565 nm as expected, whereas a 1,4-NADH sample at similar concentration (0.5 mM) presents a clear peak (in red). This confirms that the kit is only sensitive to 1,4-NADH but not to 1,2- and 1,6-NADH.

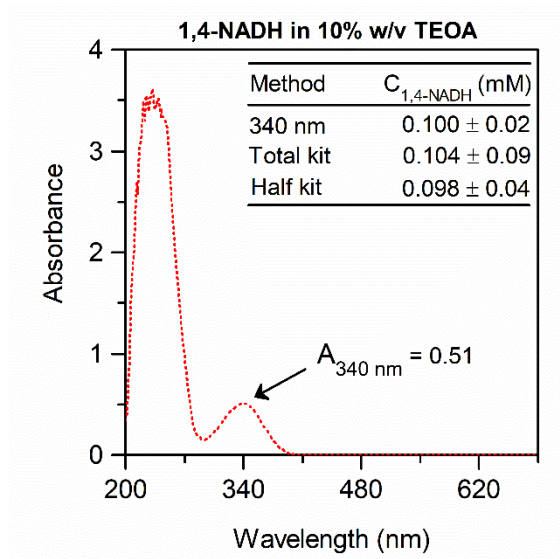

**Fig. S3:** Demonstration of the practical validity of the analytical method by mimicking a photocatalytic reaction sample containing 10% w/v TEOA and 1,4-NADH (scanned spectrum at 0.1 mM concentration); Inset: the concentration of 1,4-NADH determined by the three methods: 340 nm UV-Vis, total enzymatic kit and half enzymatic kit.

In Fig. S3, we have mimicked a “sample” from a photocatalytic reaction including 10 w/v% TEOA in the solution. The kit still works well and quantifies correctly the known concentration of 1,4-NADH. We suggest here if any potential interfering reagents exist (at high concentrations) or sample pH is too far off neutral, the sample volume should be kept as low as possible and balanced with pH = 7 buffer to minimise potential effects on the method.

## References

1. S. Chaykin, K. Chakraverty, L. King and J. G. Watson, *Biochim. Biophys.*, 1966, **124**, 1-12.
2. (a) X. Wang and H. H. Yiu, *ACS Catal.*, 2016, **6**, 1880-1886; (b) T. Saba, J. W. Burnett, J. Li, X. Wang, J. A. Anderson, P. N. Kechagiopoulos and X. Wang, *Catal. Today*, 2020, 339, 281-289.
3. J. Roche, K. Groenen-Serrano, O. Reynes, F. Chauvet and T. Tzedakis, *Chem. Eng. J.*, 2014, **239**, 216-225.
4. C. Zor, H. A. Reeve, J. Quinson, L. A. Thompson, T. H. Lonsdale, F. Dillon, N. Grobert and K. A. Vincent, *Chem. Comm.*, 2017, **53**, 9839-9841.
5. L. Zhang, N. Vila, G. Kohring, A. Walcarius and M. Etienne, *ACS Catal.*, 2017, **7**, 4386-4394.
6. R. Barin, S. Rashid-Nadimi, D. Biria and M. A. Asadollahi, *Electrochim. Acta*, 2017, **247**, 1095-1102.
7. I. Ali, N. Ullah, M. A. McArthur, S. Coulombe and S. Omanovic, *Can. J. Chem. Eng.*, 2018, **96**, 68-73.
8. S. Kim, M. K. Kim, S. H. Lee, S. Yoon and K. Jung, *J. Mol. Catal. B: Enzym.*, 2014, **102**, 9-15.
9. L. L. Tang, W. A. Gunderson, A. C. Weitz, M. P. Hendrich, A. D. Ryabov and T. J. Collins, *J. Am. Chem. Soc.*, 2015, **137**, 9704-9715.
10. A. Bucci, S. Dunn, G. Bellachioma, G. Menendez Rodriguez, C. Zuccaccia, C. Nervi and A. Macchioni, *ACS Catal.*, 2017, **7**, 7788-7796.
11. J. J. Soldevila-Barreda, I. Romero-Canelón, A. Habtemariam and P. J. Sadler, *Nat. Comm.*, 2015, **6**, 6582.
12. V. Ganesan, D. Sivanesan and S. Yoon, *Inorg. Chem.*, 2017, **56**, 1366-1374.
13. S. Kim, G. Y. Lee, J. Baeg, Y. Kim, S. Kim and J. Kim, *J. Phys. Chem. C*, 2014, **118**, 25844-25852.
14. J. Liu and M. Antonietti, *Energy Environ. Sci.*, 2013, **6**, 1486-1493.
15. K. A. Brown, M. B. Wilker, M. Boehm, H. Hamby, G. Dukovic and P. W. King, *ACS Catal.*, 2016, **6**, 2201-2204.
16. X. Ji, Z. Su, P. Wang, G. Ma and S. Zhang, *Small*, 2016, **12**, 4753-4762.
17. X. Huang, J. Liu, Q. Yang, Y. Liu, Y. Zhu, T. Li, Y. H. Tsang and X. Zhang, *RSC adv.*, 2016, **6**, 101974-101980.
18. X. Ji, C. Liu, J. Wang, Z. Su, G. Ma and S. Zhang, *J. Mater. Chem. A*, 2017, **5**, 5511-5522.
19. D. Yang, H. Zou, Y. Wu, J. Shi, S. Zhang, X. Wang, P. Han, Z. Tong and Z. Jiang, *Ind. Eng. Chem. Res.*, 2017, **56**, 6247-6255.
20. S. K. Kuk, R. K. Singh, D. H. Nam, R. Singh, J. Lee and C. B. Park, *Angew. Chem. Int. Ed.*, 2017, **56**, 3827-3832.
21. D. H. Nam, S. K. Kuk, H. Choe, S. Lee, J. W. Ko, E. J. Son, E. Choi, Y. H. Kim and C. B. Park, *Green Chem.*, 2016, **18**, 5989-5993.
22. S. Wang, M. Li, A. J. Patil, S. Sun, L. Tian, D. Zhang, M. Cao and S. Mann, *J. Mater. Chem. A*, 2017, **5**, 24612-24616.
23. D. H. Nam, G. M. Ryu, S. K. Kuk, D. S. Choi, E. J. Son and C. B. Park, *Appl. Catal. B: Environ.*, 2016, **198**, 311-317.
